# Supplementary material for: Simultaneously high fracture toughness and transverse rupture strength in ultrafine cemented carbide
Source: Royal Society of Chemistry journal article supplement (doi:10.1039/c3ce40211h), 2013-01-01
Supplement: c3ce40211h.pdf [file c3ce40211h.pdf]

## **Supporting Information for:**

### **Simultaneously high fracture toughness and transverse rupture strength in ultrafine cemented carbide**

Chongbin Wei, Xiaoyan Song\*, Jun Fu, Xuemei Liu, Haibin Wang, Yang Gao, Yao Wang

*College of Materials Science and Engineering, Key Laboratory of Advanced Functional Materials,*

*Education Ministry of China, Beijing University of Technology, Beijing 100124, China*

#### **1. Back-scattered electronic image of the present WC-10wt.%Co bulk**

As shown in Fig. S1, there is a homogeneous distribution of the binder phase, as exhibited by the dark contrast in the SEM image below.

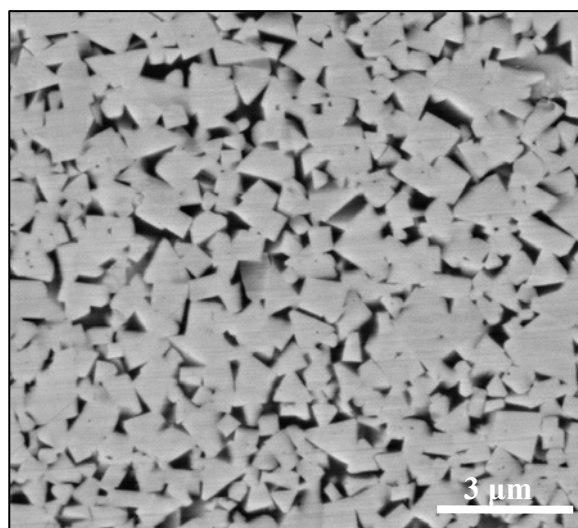

Fig. S1 SEM micrograph of the present WC-10wt.%Co bulk specimen

#### **2. Properties of the present WC-10wt.%Co bulk materials**

The porosity was analyzed by quantitative metallographic method on the polished surface according to ISO 4505 standard, where A00, A02, A04, A06 codes correspond to 0.02, 0.06, 0.2, 0.6 vol.% porosity, respectively (for pore sizes below 10 μm). The density of the specimens was measured by the

---

\* Corresponding author. Tel. (fax): +86 10 67392311  
E-mail address: xysong@bjut.edu.cn (X. Song).

Archimedes method. The hardness was measured by the Vickers hardness tester with a load of 30kg according to the ISO-3878 standard. The fracture toughness was determined based on the measurements on the length of cracks generated by the Vickers indentation and calculations with the equation  $K_{IC} = 0.0028(HV \frac{P}{L})^{1/2}$  [1], where  $HV$  is the indentation hardness,  $P$  is the indentation load, and  $L$  is the total crack length.

The  $K_{IC}$  measurements by this method are very sensitive to the surface stress state of the specimen. Thus, it is important to prepare a testing surface to minimize the residual compression stress [2]. For this reason, preparation of the samples was carefully carried out, using fine grinding conditions, followed by prolonged times of polishing by successive fine diamond paste [3]. In this study, the indentation toughness was evaluated with at least five indentations on each specimen.

The TRS was measured according to the standard of ISO3327:2009 with dimensions of  $20 \times 6.5 \times 5.25 \text{ mm}^3$ .

**Table S1** Properties of the present WC-Co specimen

| Material  | Properties | Porosity  | Relative density (%) | HV <sub>30</sub> (kgf/mm <sup>2</sup> ) | K <sub>IC</sub> (MPa·m <sup>1/2</sup> ) | TRS (MPa) |
|-----------|------------|-----------|----------------------|-----------------------------------------|-----------------------------------------|-----------|
| WC-10.%Co |            | A02B00C00 | 99.99                | 1537                                    | 15.93                                   | 4260      |

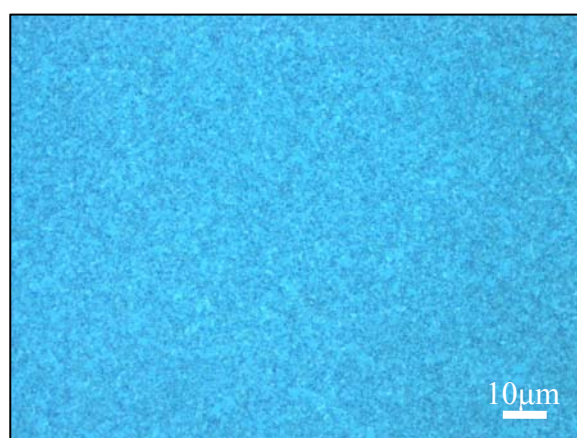

Fig. S2 Optical micrograph of the present WC-10wt.%Co bulk

### 3. Properties of all the tested WC-10wt.%Co samples

Table S2 Mechanical properties of all the tested WC-10wt.%Co specimens

| Properties<br>NO. | HV <sub>30</sub><br>(kgf/mm <sup>2</sup> ) | $\bar{x} \pm s$ | K <sub>IC</sub><br>(MPa·m <sup>1/2</sup> ) | $\bar{x} \pm s$ | TRS<br>(MPa) | $\bar{x} \pm s$ |
|-------------------|--------------------------------------------|-----------------|--------------------------------------------|-----------------|--------------|-----------------|
| 1                 | 1537                                       |                 | 15.93                                      |                 | 4260         |                 |
| 2                 | 1520                                       |                 | 15.32                                      |                 | 4140         |                 |
| 3                 | 1550                                       | 1549±22         | 14.40                                      | 14.98±0.78      | 4400         | 4218±134        |
| 4                 | 1577                                       |                 | 13.97                                      |                 | 4250         |                 |
| 5                 | 1560                                       |                 | 15.28                                      |                 | 4044         |                 |

[1] D.K. Shetty, I.G. Wright, P.N. Mincer, A.H. Clauer, *J. Mater. Sci.*, 1985,20,1873.

[2] M.T. Laugier. *J. Mater. Sci. Lett.*,1987,6,897.

[3] J.M. Sanchez, A. Ordoñez, Gonzalez. *Int. J. Refract. Met. Hard. Mater.*, 2005,23,193.
